# Supplementary figures and images for: Chemical composition and potential bioactivity of strawberry pomace
Source: Royal Society of Chemistry journal article supplement (doi:10.1039/c4ra14296a), 2014-12-11

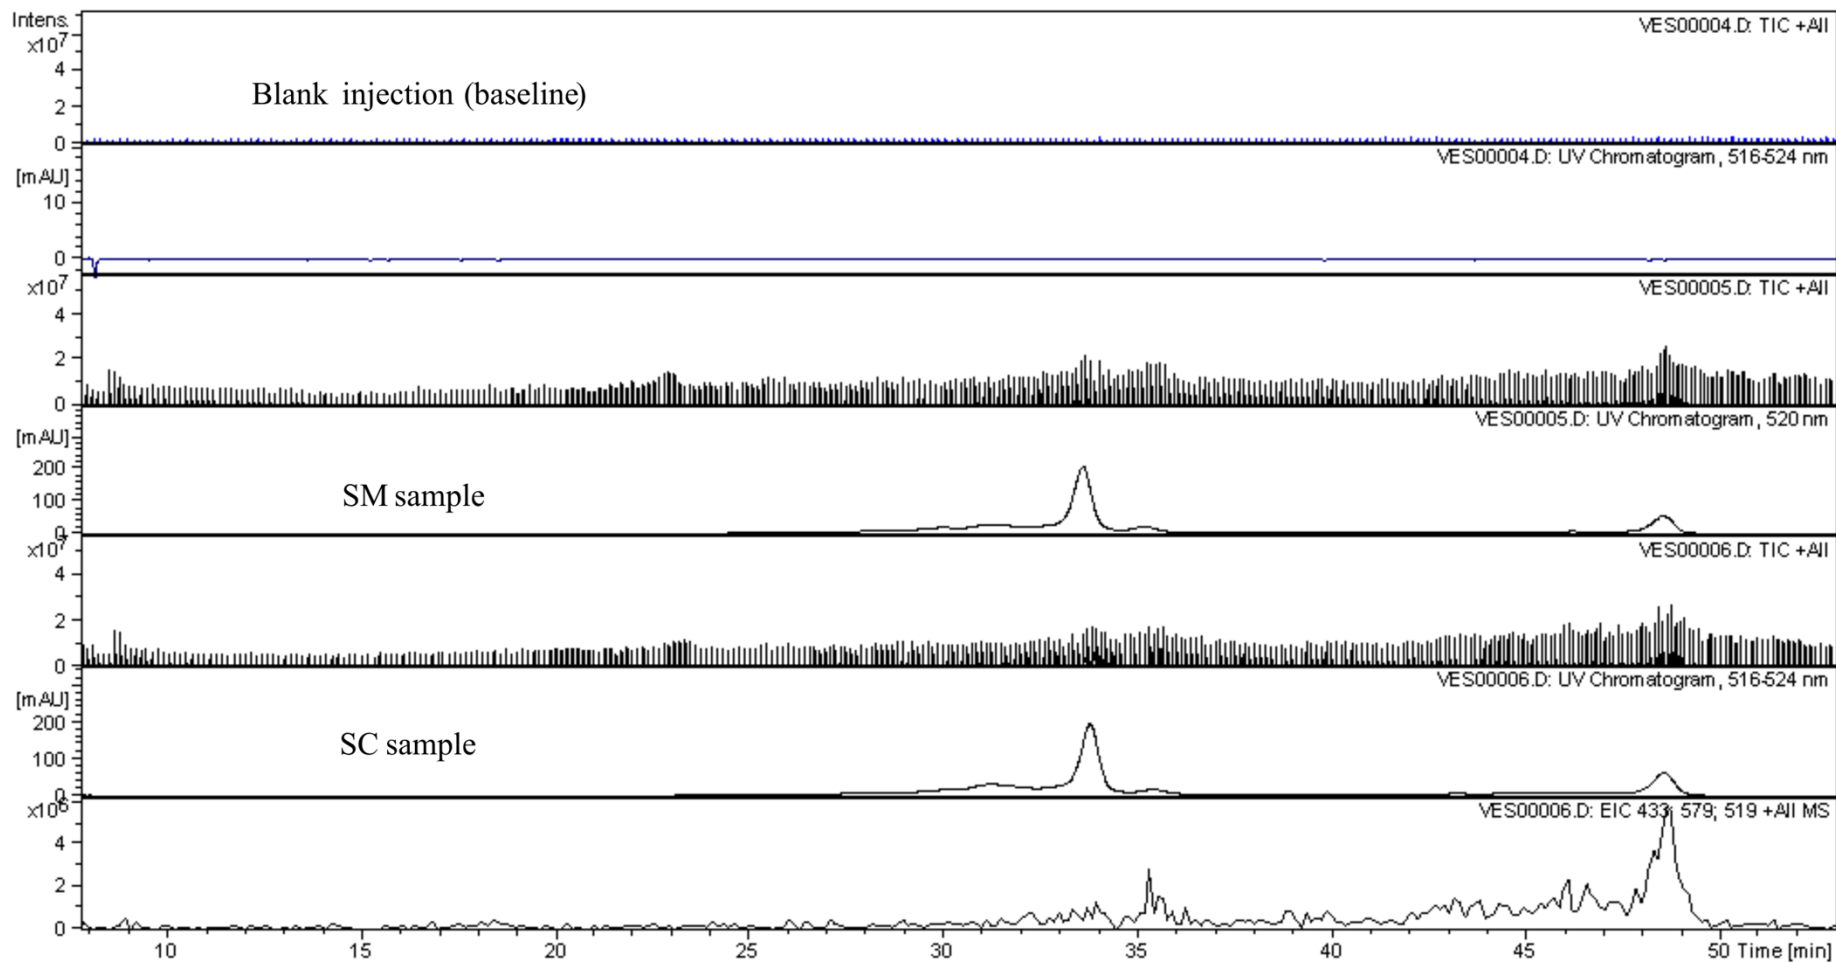

Supplement: c4ra14296a1.pdf [file c4ra14296a1.pdf]
